1  
2  
3  
4  
5  
6  
7  
8  
9  
10  
11  
12  
13  
14  
15  
16  
17  
18  
19  
20  
21  
22  
23  
24  
25  
26  
27  
28

## **The Folding Pathway of an Ig Domain is Conserved On and Off the Ribosome**

Pengfei Tian<sup>1‡</sup>, Annette Steward<sup>2‡</sup>, Renuka Kudva<sup>3‡</sup>, Ting Su<sup>5‡</sup>, Patrick J. Shilling<sup>3</sup>, Adrian A. Nickson<sup>2</sup>, Jeffrey J. Hollins<sup>2</sup>, Roland Beckmann<sup>5</sup>, Gunnar von Heijne<sup>3,4#</sup>, Robert B. Best<sup>1#</sup> and Jane Clarke<sup>2#</sup>

<sup>1</sup>Laboratory of Chemical Physics, NIDDK, National Institutes of Health, 5 Memorial Drive, Bethesda, MD 20892-0520, USA.

<sup>2</sup>Department of Chemistry, University of Cambridge, Lensfield Road, Cambridge, CB2 1EW, UK.

<sup>3</sup>Department of Biochemistry and Biophysics, Stockholm University, SE-10691 Stockholm, Sweden.

<sup>4</sup>Science for Life Laboratory Stockholm University, Box 1031, SE-171 21 Solna, Sweden.

<sup>5</sup>Gene Center, Department of Biochemistry and Center for Integrated Protein Science Munich, CiPS-M, Feodor-Lynen-Strasse 25, Ludwig Maximilian University of Munich, 81377 Munich, Germany.

<sup>‡</sup>P.T., A.S., R.K. and T.S. contributed equally to this work.

<sup>#</sup>Corresponding authors

29 **Summary**

30

31 Proteins that fold cotranslationally do so in a restricted configurational space, due to the  
32 volume occupied by the ribosome. Here, we investigate the cotranslational folding of an all- $\beta$   
33 immunoglobulin domain, titin I27, whose intrinsic folding mechanism has been extensively  
34 characterized. Using an arrest peptide-based assay and structural studies by cryo-EM, we  
35 show that I27 folds in the mouth of the ribosome exit tunnel. Simulations that use a kinetic  
36 model for the force-dependence of escape from arrest, accurately predict the fraction of  
37 folded protein as a function of length. We used these simulations to probe the folding  
38 pathway on and off the ribosome. Our simulations - which also reproduce experiments on  
39 mutant forms of I27 - show that I27 folds, while still sequestered in the ribosome, by  
40 essentially the same pathway as free I27, with only subtle shifts of critical contacts from the  
41 C to the N terminus.

## 42 **Introduction**

43 The nature of cotranslational protein folding is likely determined by a number of biophysical  
44 factors, in particular the intrinsic folding properties of the protein under consideration (1-6),  
45 together with the effects the ribosome itself may have on the folding process (7-13). Small  
46 proteins can fold inside the ribosome exit tunnel (e.g., the small zinc finger domain ADR1a)  
47 (14), other proteins can fold at the mouth of the tunnel (e.g., the three-helix bundle spectrin  
48 domains) (15), and yet others may be simply too large to fold within the confines of the  
49 ribosome (e.g., DHFR) (16). But, in addition to the spatial constraints imposed upon the  
50 nascent chain by the confines of the tunnel, the ribosome may itself affect the folding process  
51 (15, 17-20). The stability of folded or partly folded states may be reduced when folding  
52 occurs close to, or within the confines of, the ribosome simply due to steric exclusion effects.  
53 Interactions of the folded state with the ribosome itself may also be stabilising, or indeed,  
54 destabilising (21, 22). Finally, since translation is vectorial in nature, it is possible that when  
55 proteins fold cotranslationally they fold via different pathways than those used when proteins  
56 fold outside the ribosome or when isolated proteins fold *in vitro* (15, 23-26).

57 The folding of the protein close to the ribosome generates a pulling force on the  
58 nascent chain. This force has been probed by single molecule (27) as well as arrest peptide  
59 (AP) experiments (14-16). The folding kinetics are expected to be correspondingly altered,  
60 with the rate of folding likely to be decreased and the unfolding rate increased, in close  
61 proximity to the ribosome (which again result in destabilization of the protein). In this study,  
62 we use such arrest peptide-based cotranslational force-measurement experiments,  
63 simulations, and structural studies to investigate how the ribosome affects the folding of the  
64 small all- $\beta$  immunoglobulin domain, titin I27. Results from all three techniques show that  
65 I27 folds in the mouth of the ribosome exit tunnel. Our simulations correctly capture the  
66 onset of folding in I27 and three mutant variants, allowing us to predict how destabilisation  
67 of regions that fold early and late in the isolated domain affect folding on the ribosome. Our  
68 simulations further show that the folding pathway of I27 is largely unaffected by the presence  
69 of the ribosome, except for small but significant changes observed for contacts near the N  
70 and C termini.

71

## 72 **Results**

### 73 *I27 folds close to the ribosome*

74 In order to gain insight into when I27 can commence folding on the ribosome, we employed  
75 an arrest peptide force-measurement assay (28) carried out using the PURE *in vitro*  
76 translation system, as described in (14-16). In these experiments, the *E. coli* SecM arrest  
77 peptide (AP) is used to stall the nascent protein chain temporarily during translation. The  
78 yield of full-length protein which escapes stalling in a defined time interval ( $f_{FL}$ ), determined  
79 from SDS-PAGE gels, provides a proxy for the pulling force exerted on the nascent chain by  
80 the protein as it folds (14-16) (Figure 1A). By measuring  $f_{FL}$  for a set of constructs where the  
81 length  $L$  of the linker between the target protein and the SecM AP is systematically varied, a  
82 force profile can be recorded that reflects the points during translation where the folding  
83 process starts and ends.

84 The force profile for wild-type I27 (Figure 1B) has a distinct peak at  $L = 35-38$   
85 residues (see Methods for sequences of the constructs). This peak is absent from the force  
86 profile for the mutant I27[W34E], a non-folding variant of I27, demonstrating that the peak is  
87 due to a folding event and not, for example, to non-specific interactions of the unfolded  
88 nascent chain with the ribosome. The non-zero  $f_{FL}$  for the non-folding mutant is attributed to  
89 the spontaneous rate of escape from arrest in the absence of acceleration by forces associated  
90 with folding. Since it takes  $\sim 35$  residues in an extended conformation to span the  $\sim 100$  Å  
91 long exit tunnel (29), the critical length  $L \approx 35$  residues suggests that I27 starts folding while  
92 in mouth of the exit tunnel.



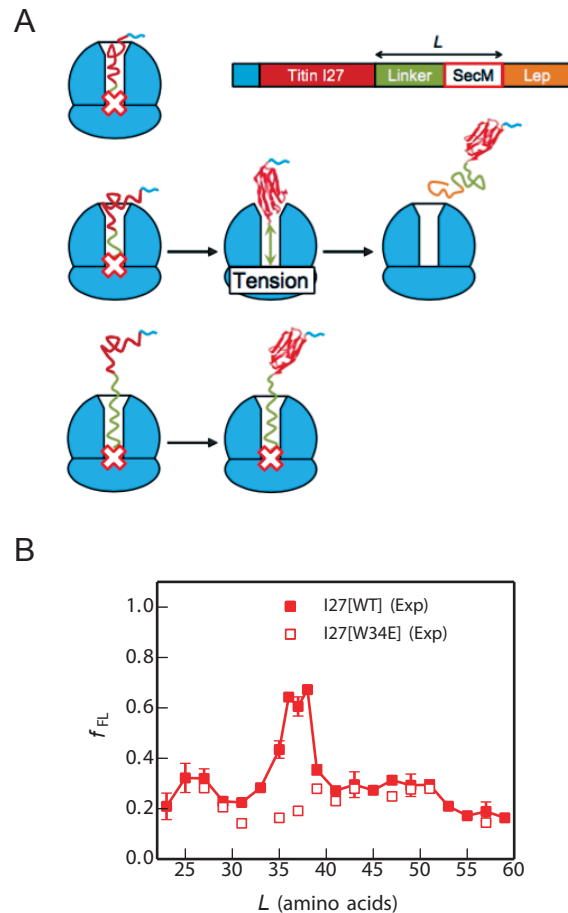

93

94 **Figure 1.** Cotranslational folding of the titin I27 domain by force-profile analysis. (A) The  
95 force-measurement assay (modified from (15)). I27, preceded by a His-tag, is placed  $L$   
96 residues away from the last amino acid of the SecM AP, which in turn is followed by a 23-  
97 residue C-terminal tail derived from *E. coli* LepB. Constructs are translated for 15 min. in the  
98 PURE *in vitro* translation system, and the relative amounts of arrested and full-length peptide  
99 chains produced are determined by SDS-PAGE. The fraction full-length protein,  $f_{FL}$ , reflects  
100 the force exerted on the AP by the folding of I27 at linker length  $L$ . At short linker lengths  
101 (top), there is not enough room in the exit tunnel for I27 to fold, little force is exerted on the  
102 AP, and the ribosome stalls efficiently on the AP ( $f_{FL} \approx 0$ ). At intermediate linker lengths  
103 (middle), there is enough room for I27 to fold but only if the linker segment is stretched,  
104 force is exerted on the AP, and stalling is reduced ( $f_{FL} > 0$ ). At long linker lengths (bottom),  
105 I27 has already folded when the ribosome reaches the last codon in the AP, and again little  
106 force is exerted on the AP ( $f_{FL} \approx 0$ ). (B) Force profiles for the I27 domain (solid squares) and  
107 the non-folding (nf) mutant I27[W34E] (open squares). The standard error of  $f_{FL}$  is calculated  
108 for values of  $L$  where three or more experiments were performed.

109

110 *Cryo-EM shows that I27 folds in the mouth of the exit tunnel*

111 To confirm that the peak in the force profile corresponds to the formation of a folded I27  
112 domain, we replaced the SecM AP with the stronger TnaC AP (30-32) and purified stalled  
113 ribosome-nascent chain complexes (RNCs) carrying an N-terminally His-tagged I27[L=35]

114 construct (see Methods). The construct was expressed in *E. coli*, RNCs were purified using  
115 the N-terminal His-tag, and an RNC structure with an average resolution of 3.2 Å (Figure 2-  
116 figure supplement 1) was obtained by cryo-EM. In addition to the density corresponding to  
117 the TnaC AP, a well-defined globular density (~4.5-9 Å resolution) was visible protruding  
118 from the exit tunnel (Figure 2A). The NMR structure of I27 (PDB: 1TIT (33)) was fit into  
119 this density (Figure 2B and Video 1) with the C-terminal end extending into the exit tunnel.  
120 Orientation validation shows that this is the most reasonable way of fitting, (Figure 2-figure  
121 supplement 2). The I27 domain packs against ribosomal proteins uL24, uL29, and ribosomal  
122 23S RNA (Figure 2C) as if it is being pulled tight against the ribosome by the nascent chain.  
123 We conclude that the peak at  $L = 35-38$  residues in the force profile indeed represents the  
124 cotranslational folding of the I27 domain at the tunnel exit.

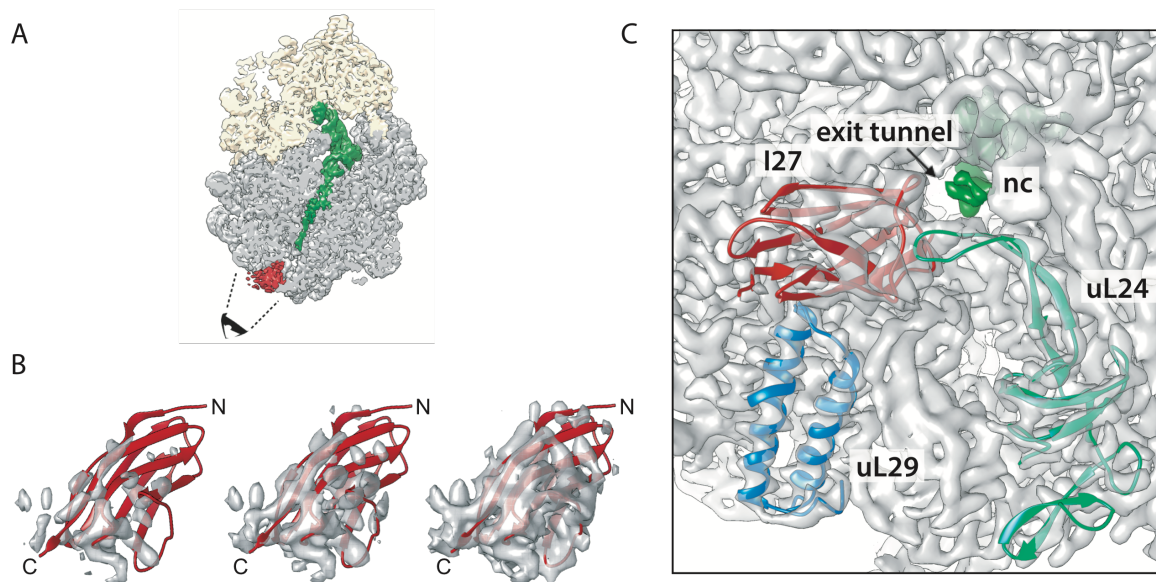

125

126 **Figure 2.** Cryo-EM structure of I27[L=35] RNCs. (A) Cryo-EM reconstruction of the I27–  
127 TnaC[L = 35] RNC. The ribosomal small subunit is shown in yellow, the large subunit in  
128 grey, the peptidyl-tRNA with the nascent chain in green, and an additional density  
129 corresponding to I27 at the ribosome tunnel exit in red. The black cartoon eye and dash lines  
130 indicate the view of angle of panel (C). The density contour level for feature visualization is  
131 at 1.7 times root-mean-square deviation (1.7 RMSD). (B) Rigid-body fit of the I27 domain  
132 (PDB: 1TIT) to the cryo-EM density map displaying from high (left) to low (right) contour  
133 levels at 2.6, 2.0 and 1.4 RMSD, respectively. N and C represent the N and C termini of the  
134 I27 domain, respectively. (C) View looking into the exit tunnel (arrow) with density for the  
135 nascent chain (nc) in dark green. Ribosomal proteins uL29 (blue; PDB: 4UY8), uL24 (light  
136 green; the  $\beta$  hairpin close to I27 domain was re-modelled based on PDB: 5NWX) and the  
137 fitted I27 domain (red) are shown in cartoon mode; 23S RNA and proteins not contacting I27  
138 are shown as density only. The density contour level is at 5 RMSD excluding tRNA, nascent  
139 chain and I27 domain, which are displayed at 1.7 RMSD.

140

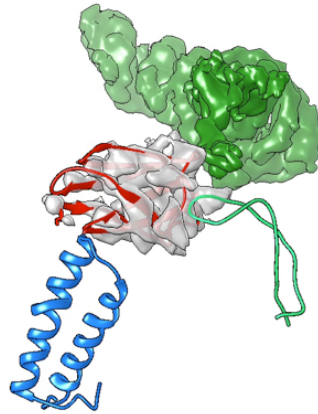

141

142 **Video 1.** Cryo-EM density of ribosome and I27 (one static frame of the video). Video  
143 showing cryo-EM map for I27[L=35] RNCs. 30S in yellow, 50S and I27 domain in grey,  
144 tRNA and nascent chain in green, the model (PDB: 1TIT) of I27 domain in red.

145

146 *Coarse-grained molecular dynamics simulations recapitulate I27 folding on the ribosome*

147 In order to provide an independent means of estimating the force exerted on the nascent chain  
148 by the cotranslational folding of the I27 domain, we calculated force profiles by coarse-  
149 grained MD simulations (see Methods). Briefly, in the MD model, the 50S subunit of the *E.*  
150 *coli* ribosome (34) (PDB: 3OFR) and the nascent chain are explicitly represented using one  
151 bead at the position of the C $\alpha$  atom per amino acid, and three beads (for P, C4, N3) per RNA  
152 base (Figure 3A). The interactions within the protein were given by a standard structure-  
153 based model (35-37), which allowed it to fold and unfold. Interactions between the protein  
154 and ribosome beads were purely repulsive. The ribosome beads were fixed in space, as in  
155 previous simulation studies (38). I27 was covalently attached to unstructured linkers having  
156 the same sequences as those used in the force-profile experiments (Figure 3B) and the C  
157 terminus of the linker was tethered to the last P atom in the A-site tRNA with a harmonic  
158 potential, allowing the force exerted by the folding protein to be directly measured. For each  
159 linker length  $L$ , we used umbrella sampling to determine the average force exerted on the AP  
160 by the protein in the folded and unfolded states while arrested, as well as the populations of  
161 those two states (Figure 3C).

162

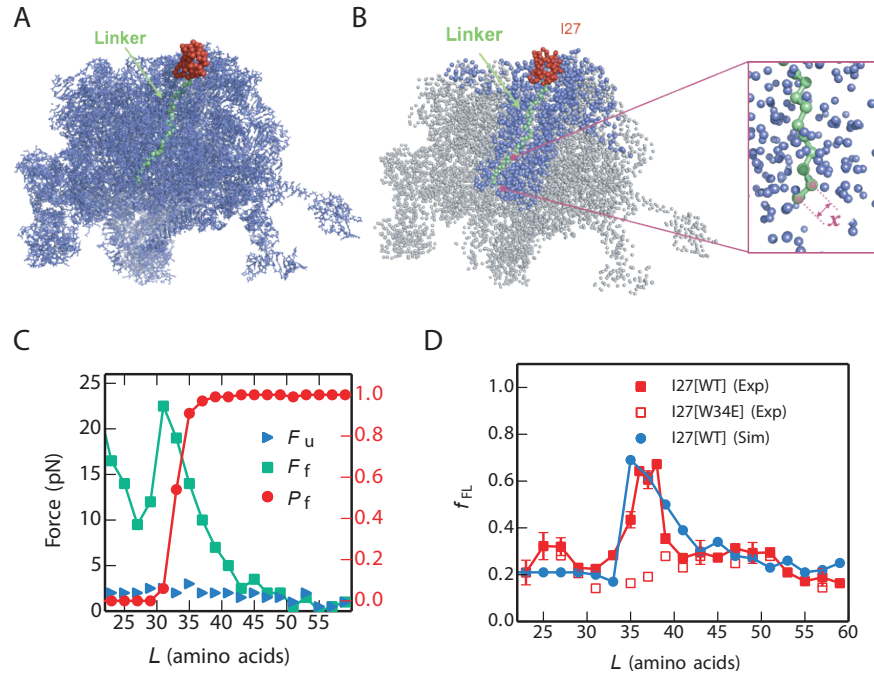

163

164 **Figure 3.** MD simulations of cotranslational folding of I27. (A) 50S subunit of the *E. coli*  
 165 ribosome (PDB: 3OFR) with I27[ $L=35$ ] attached via an unstructured linker. (B) Coarse-  
 166 grained model for I27 (red) and linker (green), with surrounding ribosomal pseudo-atoms in  
 167 blue. Pseudo-atoms with grey colour are not used in the simulations. The instantaneous force  
 168 exerted on the AP is calculated from the variation in the distance  $x$  between the C-terminal  
 169 Pro pseudo-atom and the next pseudo-atom in the linker (see inset). (C) Average forces  
 170 exerted on the AP by the unfolded state ( $F_u$ , blue) and folded state ( $F_f$ , green) of I27 at  
 171 different linker lengths  $L$ . The average fraction folded I27 for different  $L$ ,  $P_f$ , is shown in red  
 172 on the right axis. Free energy profiles of each linker length are shown in Figure 3-  
 173 supplement figure 1. (D) Experimental (red) and simulated (blue) force profiles for  
 174 cotranslational folding of I27.

175

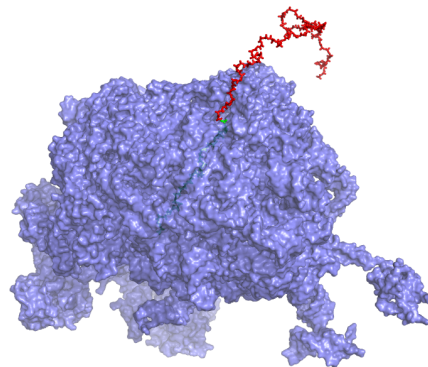

176

177 **Video 2.** MD folding simulation (one static frame of the video). Video showing an unbiased  
 178 1.8  $\mu$ sec fragment of an MD trajectory of I27 folding and unfolding at linker length  $L=35$ .  
 179 Ribosome shown in blue surface representation, I27 and linker in red and green wireframe  
 180 respectively.

181

182           Given the empirically-determined force-dependence of the escape rate  $k(F)$  (27), here  
183 approximated by a Bell-like model (39), we can determine the expected escape rate while the  
184 protein is in the unfolded or folded state, from which the fraction full-length protein obtained  
185 with a given linker length and incubation time can be determined, as described in Methods.  
186 The calculated  $f_{FL}$  profile for I27 is shown in Figure 3D (see also Figure 1-figure supplement  
187 1). It matches the experimental profile remarkably well. In the simulations with the  
188 I27[ $L=35$ ] construct, the folded I27 domain is seen to occupy positions that largely overlap  
189 with the cryo-EM structure (Video 2). Overall, these results suggest that the MD model  
190 provides a good representation of the folding behaviour of the I27 domain in the ribosome  
191 exit tunnel.

192

### 193 *Force profiles of I27 variants probe the folding pathway*

194 To test whether the cotranslational folding pathway is the same as that observed for the  
195 isolated I27 domain *in vitro*, we decided to investigate three destabilised variants of I27, both  
196 by simulation and experiment. One mutation in the core, Leu 58 to Ala (L58A), located in  $\beta$ -  
197 strand E (Figure 4A) destabilizes the protein by 3.2 kcal mol<sup>-1</sup>, and removes interactions that  
198 form early during folding of the isolated domain, playing a key role in formation of the  
199 folding nucleus ( $\phi$ -value = 0.8) (40). Two further mutations, M67A and deletion of the N-  
200 terminal A-strand, remove interactions that form late in the folding of I27 (*i.e.*, both mutants  
201 have low  $\phi$ -values (40, 41)). The A-strand is the first part of I27 to emerge from the  
202 ribosome, while M67 is located in a part of I27 that is shown by cryo-EM to be located in  
203 very close proximity to a  $\beta$  hairpin loop of ribosomal protein uL24 in I27-TnaC[ $L=35$ ] RNCs  
204 (Figure 2-figure supplement 3A). The interaction with the I27 domain shifts the tip of this  
205 uL24 hairpin by about 6 Å compared to its location in other RNC structures (Figure 2-figure  
206 supplement 3B).



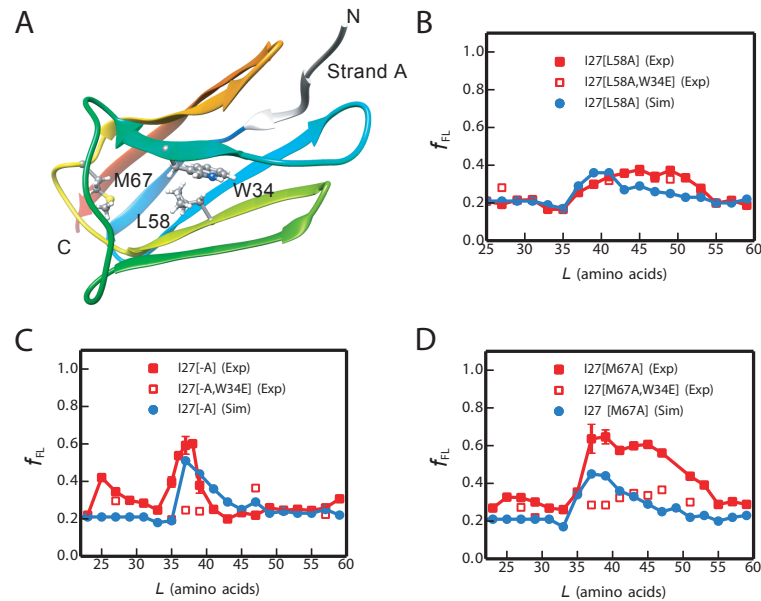

207

208 **Figure 4.** Simulations capture the experimental force profiles for mutant I27 domains. (A)  
209 Mutated residues in I27 (sticks). (B-D) Experimental (red) and calculated (blue) force  
210 profiles for (B) I27[L58A], (C) A-strand deletion mutant I27[-A], (D) I27[M67A].  
211 Experimental force profiles for non-folding mutants that contain an additional W34E  
212 mutation are shown as red open squares.

213

214 The simulated force profile for the L58A variant predicts a much lower force peak than for  
215 wild-type I27; likewise, the experimental force peak is lower and broader than for wild-type,  
216 extending from  $L = 37$ -53 residues (Figure 4B). The  $f_{FL}$  values are very similar to those  
217 obtained for I27[L58A,W34E], a non-folding variant of I27[L58A]. Therefore, the weak  
218 forces seen at  $L \approx 40$ -50 residues are not due to a folding event, indicating that I27[L58A]  
219 does not exert an appreciable force due to folding near the ribosome.

220 The A-strand comprises the first seven residues of I27 and removal of this strand, I27[-A],  
221 results in a destabilisation of  $2.78 \text{ kcal mol}^{-1}$ ; however, both the simulated and experimental  
222 force profiles for I27[-A] are very similar to those for wild-type I27 (Figure 4C). Residue  
223 M67 is located in the E-F loop, and mutation to alanine results in a destabilisation of  $2.75$   
224  $\text{kcal mol}^{-1}$ ; for this variant, folding commences at  $L \approx 35$  residues as for wild-type I27, but the  
225 peak is much broader (Figure 4D). In this case, simulation does not predict the full height of  
226 the peak observed in the experimental  $f_{FL}$  profile, but is suggestive of a broader peak. Non-  
227 folding control experiments for variants I27[-A,W34E], and I27[M67A,W34E] (Figure 4C  
228 and D) show that the peaks in the force profiles for these variants are due to a folding event.  
229 These results show that deletion of the A-strand and destabilisation of the E-F loop do not

230 affect the onset of cotranslational folding of I27, but that the M67A mutation increases the  
231 width of the folding transition.

232 *The folding pathway is only subtly affected by the presence of the ribosome.*

233 To compare the folding pathways when the protein is folding near the tunnel exit or outside  
234 the ribosome, we estimated  $\phi$ -values based on the transition path of I27 folding on the  
235 ribosome from our coarse-grained simulations, using a method introduced previously(42).  
236 For each linker length, 30 transition paths were collected from MD simulations. To reduce  
237 the uncertainty from experimental reference data, the experimental  $\phi$ -values were chosen if  
238 the thermodynamic stability change between the mutant and the wild type is sufficiently large  
239 ( $|\Delta\Delta G| > 7$  kJ/mol) (43). As seen in Figure 5A, when the linker length is long ( $L = 51$   
240 residues) and I27 is allowed to fold outside the ribosome, the calculated  $\phi$ -values are  
241 consistent with the experimental values obtained for the folding of isolated I27 *in vitro* (40).  
242 For shorter linker lengths ( $L = 31$  and 35 residues), calculated  $\phi$ -values remain largely  
243 unchanged except for a slight increase near the N terminus (around residues 3-6) and a slight  
244 decrease near the C terminus (around residues 72-74) (Figure 5B and C).

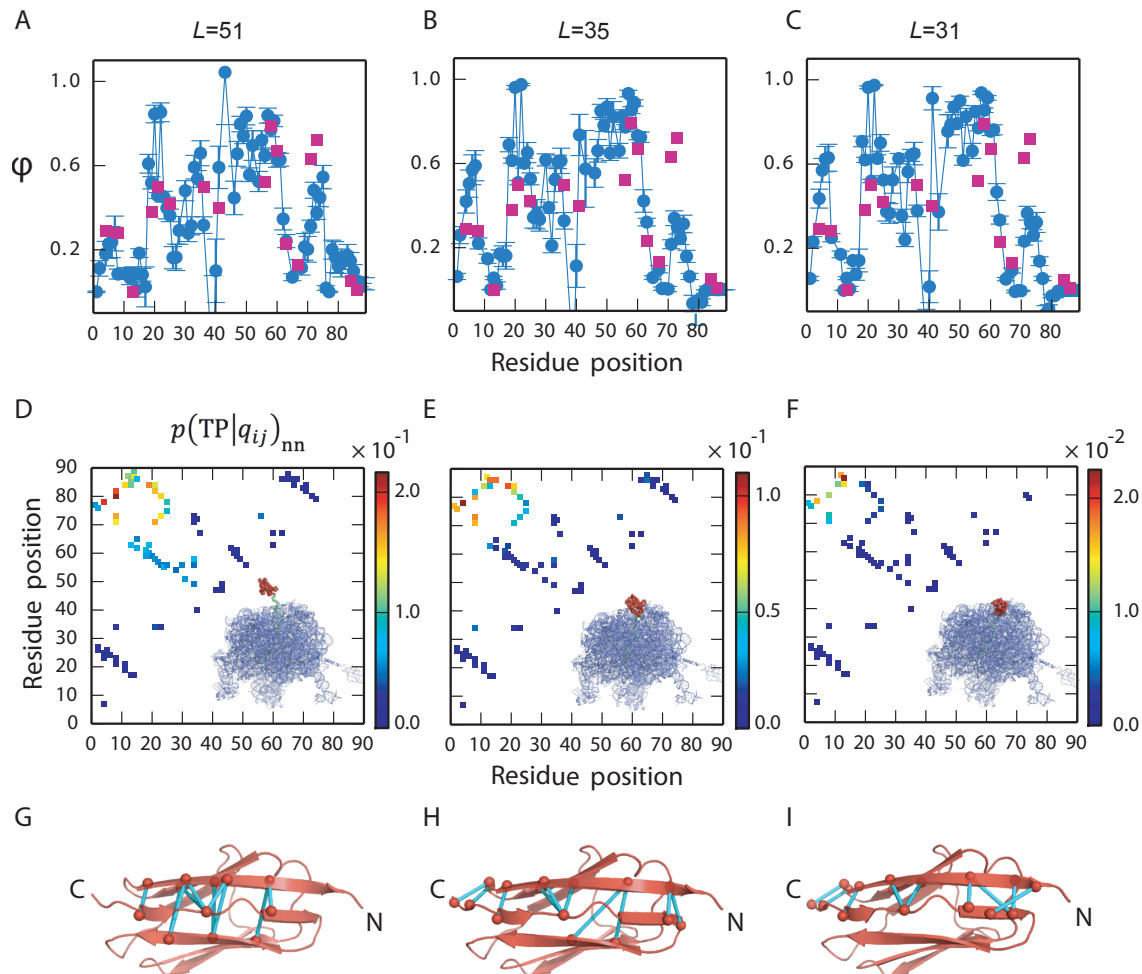

245

246 **Figure 5.** Simulated folding pathways for ribosome-tethered I27. LH column,  $L=51$ ; middle  
 247 column,  $L= 35$ ; RH column,  $L=31$ . Top panels: Simulated  $\phi$ -values for I27 (blue).  $\phi$ -values  
 248 determined by *in vitro* folding of purified I27 are shown as red squares. At  $L=51$  the  
 249 simulated  $\phi$ -values match well with experiment. At  $L=35$  and  $L=31$  the simulated  $\phi$ -values  
 250 are higher at the N terminus and lower at the C terminus, than the experimental values,  
 251 reflecting a change in importance of these regions when I27 folds in the confines of the  
 252 ribosome. Middle row: Relative probability that if a particular contact is formed then the  
 253 protein is on a folding trajectory,  $p(\text{TP}|q_{ij})_{\text{nn}}$ . When the protein is constrained the limiting  
 254 factor is formation of a few key contacts. A cartoon of the ribosome with I27 in red is shown  
 255 on each panel. Bottom row: The top ten most important contacts are coloured in cyan on the  
 256 native structure.

257

258 To obtain a more detailed picture regarding the relative importance of different native  
 259 contacts in the folding mechanism, we computed the conditional probability of being on a  
 260 transition path (TP), given the formation of a contact  $q_{ij}$  between residues  $i$  and  $j$ ,  
 261  $p(\text{TP}|q_{ij})_{\text{nn}}$  (44). This quantity indicates which native contacts are most important for  
 262 determining a successful folding event.  $p(\text{TP}|q_{ij})_{\text{nn}}$  is closely related to the frequency of the



263 contact  $q_{ij}$  on transition paths  $p(q_{ij}|\text{TP})$ , but is effectively normalized by the probability that  
264 the contact is formed in non-native states  $p(q_{ij})_{\text{nn}}$ , and can be expressed as:

$$265 \quad p(\text{TP}|q_{ij})_{\text{nn}} = \frac{p(q_{ij}|\text{TP})p(\text{TP})_{\text{nn}}}{p(q_{ij})_{\text{nn}}} \quad [1]$$

266 where  $p(\text{TP})_{\text{nn}}$  is the fraction of non-native states which are on transition paths at  
267 equilibrium. The subscript nn means that only the non-native segments of a trajectory are  
268 included, *i.e.*, unfolded states and transition paths; the native, folded state is not included in  
269 the calculation since native contacts are always formed in this state. The simulations suggest  
270 that formation of native contacts between the N and C termini is somewhat more important  
271 when folding takes place in the mouth of the exit tunnel ( $L = 31$  residues) than far outside the  
272 ribosome ( $L = 51$  residues) (Figure 5D-F, upper left-hand corner in the panels). This is likely  
273 due to the greater difficulty of forming these contacts (examples are shown in Figure 5G-I)  
274 under ribosomal confinement; therefore, forming them becomes more critical in enabling the  
275 protein to fold.

276

## 277 **Discussion**

278 Using a combination of MD simulation, force-profile measurements and cryo-EM, we have  
279 investigated the cotranslational folding pathway of the 89-residue titin I27 domain. I27 has  
280 been extensively characterised in previous *in vitro* folding studies (40, 41, 45-55). Results  
281 from all three techniques show that wild-type I27 folds in the mouth of the ribosome exit  
282 tunnel; in the cryo-EM structure of I27-TnaC[ $L=35$ ] RNCs, I27 packs against ribosomal  
283 proteins uL24, uL29, and ribosomal 23S RNA. This is in apparent contrast to a previous  
284 NMR study on another Ig-like protein, in which the domain was shown to acquire its native  
285 fold (as reflected in the NMR spectrum) only when fully outside the ribosome tunnel, at  $L =$   
286 42-47 residues linker length (22).

287 In order to determine the molecular origin of the measured force profile, we performed  
288 molecular dynamics simulations of I27 folding on the ribosome, varying the length of the  
289 linker sequence between the arrest peptide and the I27 domain. We calculated the pulling  
290 force directly from the simulations and translated this into yield of folded protein using a  
291 kinetic model parameterized based on known release kinetics of the SecM AP. This enabled  
292 us to recapitulate the experimental arrest peptide force measurement profile, and therefore  
293 relate  $f_{FL}$  directly to the force exerted on the arrest peptide. Our simulations demonstrate the

294 direct effect that the restoring force of the nascent chain can have on determining when the  
295 protein folds on the ribosome. We show that  $f_{FL}$  depends upon a combination of the force  
296 exerted by the folded protein and the fraction of folded protein at the given linker length  $L$ .

297 In order to relate how destabilization of regions that fold early and late in the isolated domain  
298 affects folding on the ribosome, we used simulations to predict the onset of folding in three  
299 mutant variants of I27. A previous  $\phi$ -value analysis of I27 (40) showed that early packing of  
300 the structurally central  $\beta$ -strands drives the folding of this domain, while peripheral strands  
301 and loop regions pack later in the folding process. Mutations in the folding core (such as  
302 L58A) slow folding, whereas mutations in the periphery have no effect on folding rates (40).  
303 L58 is a key residue in the critical folding nucleus and almost fully packed in the transition  
304 state, in isolated domain studies. The simulated and experimental force profiles of I27  
305 [L58A] show that this variant does not fold in or near the exit tunnel; hence, destabilisation of  
306 the central folding core prevents folding close to the ribosome. Since isolated I27[L58A] is  
307 fully folded, it is likely that this variant can only fold cotranslationally at longer linker  
308 lengths, when it is no longer in close proximity to the ribosome and exerts little force on the  
309 nascent chain.

310 Our experiments show that I27 variants destabilized in regions of the protein that are  
311 unstructured, or only partially structured, in the transition state, are still able to commence  
312 folding close to the ribosome. The force profiles reveal that the onset of folding of mutants  
313 with the A-strand deleted, or with the Met 67 to Ala mutation in the E-F loop, is the same as  
314 for wild-type although these have a similar destabilisation as L58A (Figure 4). We cannot at  
315 present explain the broad force peak for the M67A mutant, but note that the mutation is in a  
316 region that interacts closely with ribosomal protein uL24 in the wild-type cryo-EM structure.

317 Our simulations reproduce the onset of folding in the three mutant variants of I27 (Figure 4),  
318 and so give us the confidence to investigate how confinement within the ribosome affects the  
319 folding pathway of I27. We used simulations to investigate the folding of I27 arrested on the  
320 ribosome at various linker lengths, using a Bayesian method for testing the importance of  
321 specific contacts on the folding pathway, as well as by computing  $\phi$ -values (Figure 5).

322 Overall, we find that the mechanism and pathway of folding are robust towards variation in  
323 linker length and relatively insensitive to the presence of the ribosome; small but significant  
324 changes are observed only for contacts near the N and C termini. These shifts are consistent  
325 with the greater importance of forming N-terminal contacts when the C terminus is

326 sequestered within the exit tunnel, possibly to compensate for loss of contacts at the C  
327 terminus.

328 We have previously shown that  $\alpha$ -helical proteins can fold co-translationally (15), perhaps  
329 unsurprising since helical structures are dominated by short-range interactions and helices  
330 can form within the ribosome tunnel itself (56, 57). Here, our equilibrium arrest-peptide  
331 assay and structural studies reveal that an all- $\beta$  protein, titin I27, is able to fold within the  
332 mouth of the ribosome exit tunnel, despite its folding being dominated by long-range  
333 interactions. Molecular simulations, accounting for the effect of the entropic restoring force  
334 on protein stability, reproduce the yield of protein from experiments remarkably well. These  
335 simulations reveal that I27 folds on the ribosome by the same pathway as when the protein  
336 folds away from the confines of the ribosome.

337

### 338 **Acknowledgements**

339 This work was supported by grants from the Knut and Alice Wallenberg Foundation, the  
340 Swedish Cancer Foundation, and the Swedish Research Council to GvH, by grants from the  
341 Deutsche Forschungsgemeinschaft (DFG) GRK 1721 and FOR1805 to RB, by a DFG  
342 fellowship through the Graduate School of Quantitative Biosciences Munich (QBM) to TS,  
343 and by the Wellcome Trust (WT095195, to JC); PT and RB were supported by the Intramural  
344 Research Program of the National Institute of Diabetes and Digestive and Kidney Diseases of  
345 the National Institutes of Health; JC is a Wellcome Trust Senior Research Fellow. The cryo-  
346 EM data were collected at the Swedish National Cryo-EM Facility funded by the Knut and  
347 Alice Wallenberg Foundation, the Family Erling Persson Foundation and the Science for Life  
348 Laboratory. This work utilized the computational resources of the NIH HPC Biowulf cluster.  
349 (<http://hpc.nih.gov>)

350

### 351 **Methods**

#### 352 *Enzymes and chemicals*

353 All enzymes were obtained from Thermo Scientific. Oligonucleotides were purchased from  
354 Life Technologies. In-Fusion Cloning kits were obtained from Clontech and DNA  
355 purification kits were purchased from Qiagen. PUREfrex cell-free translation system was  
356 obtained from Eurogentec. [<sup>35</sup>S]-methionine was purchased from Perkin Elmer. Instant Blue  
357 protein stain was purchased from Expedeon.

358

359 *DNA manipulation*

360 Titin I27 constructs for *in vitro* translation were generated in pRSET A plasmid (Invitrogen)  
361 (previously modified to remove the sequence including the entire T7 gene 10 leader and EK  
362 recognition site up to, but not including, the *Bam*H I site and replaced with a sequence  
363 encoding residues L, V, P, R, G, S) carrying the *E. coli* SecM arrest peptide  
364 (FSTPVWISQAQGIRAGP) and a truncated *E. coli* *lepB* gene, under the control of a T7  
365 promoter. Increasing linker lengths were generated in pRSET A by PCR; linear pRSET A  
366 constructs (containing the SecM AP and truncated *lepB*, but lacking I27) were generated by  
367 PCR using primers which extended the linker from 23 aa to 63 aa (in steps of 2 aa) from the  
368 direction of the C to the N terminus. I27 flanked by GSGS linkers was amplified by PCR  
369 with overhanging homology to the plasmid containing the desired linker length. Cloning was  
370 performed using the In-Fusion system (Takara Bio USA, Inc.), according to the  
371 manufacturer's instructions. The final two C-terminal residues (EL) of the 89 aa Titin I27  
372 construct are not structured in the PDB file 1TIT, and are therefore included in the linker  
373 region. The amino acid sequence of the construct I27[L=63] is as follows (I27 in bold and  
374 SecM AP underlined):

375 MRGSHHHHHHGLVPRGSGSLIEVEKPLYGVEVFVGETAHFEIELSEPDVHGQWK  
376 **LKGQPLAASPDC**EHEDGKKHILILHNCQLGMTGEVSFQAANTKSAANLKVKEL  
377 SSGSGKFAYGIKDPIYQKTLVPGQQNATWIVPPGQYFMMGDWMSSEFSTPVWISQAQG  
378 IRAGPGSSDKQEGEWPTGLRLSRIGGIH\*\*

379 The mutants I27[−A] (lacking  $\beta$ -strand A), I27[L58A] and I27[M67A] were generated for  
380 each linker length by site-directed mutagenesis. For the wild-type I27 and I27[−A] constructs  
381 with  $L = 27, 35, 37, 39, 47$  and  $57$  residues, site-directed mutagenesis was performed to  
382 generate constructs with the non-functional FSTPVWISQAQGIRAGA arrest peptide  
383 (mutated residue underlined) as full-length controls, and constructs with the crucial Pro, at  
384 the end of the AP, substituted with a stop codon as arrest controls. Site-directed mutagenesis  
385 was performed to generate W34E variants as non-folding (nf) controls at  $L = 27, 29, 31, 35,$   
386  $37, 39, 41, 43, 47, 49, 51$  and  $57$  for wild-type I27;  $L = 27, 35, 37, 39, 47$  and  $57$  residues for  
387 I27[−A];  $L = 27, 41, 45, 47, 49$  and  $53$  residues for I27[L58A];  $L = 27, 29, 37, 39, 41, 43, 45,$   
388  $47$  and  $51$  residues for I27[M67A]. All constructs were verified by DNA sequencing.

389 *In vitro transcription and translation*

390 Transcription and translation were performed using the commercially available PUREfrex *in*  
391 *vitro* system (GeneFrontier Corporation), according to the manufacturer's protocol, using 250  
392  $\mu\text{g}$  plasmid DNA as template. Synthesis of [ $^{35}\text{S}$ ]-Met-labeled polypeptides was performed at  
393 37 °C, 500 r.p.m. for exactly 15 min. The reaction was quenched by the addition of an equal  
394 volume of 10% ice-cold trichloroacetic acid (TCA). The samples were incubated on ice for  
395 30 min and centrifuged for 5 min at  $20,800 \times g$  and 4 °C. Pellets were dissolved in sample  
396 buffer and treated with RNase A ( $400 \mu\text{g ml}^{-1}$ ) for 15 min at 37 °C before the samples were  
397 resolved by SDS-PAGE and imaged on a Typhoon Trio or Typhoon 9000 phosphoimager  
398 (GE Healthcare). Bands were quantified using ImageJ to obtain an intensity cross section,  
399 (<http://rsb.info.nih.gov/ij/>), which was subsequently fit to a Gaussian distribution using in-  
400 house software (Kaleidagraph, Synergy Software). The fraction full-length protein,  $f_{FL}$ , was  
401 calculated as  $f_{FL} = I_{FL}/(I_{FL}+I_A)$ , where  $I_{FL}$  and  $I_A$  are the intensities of the bands representing  
402 the full-length and arrested forms of the protein. For wild-type I27 and six nf control samples  
403 ( $L = 27, 35, 37, 39, 47$  and  $57$  residues), *in vitro* transcription and translation were also  
404 performed at 37 °C, 500 r.p.m. for exactly 30 min. The resultant force profile was slightly  
405 higher than that obtained at 15 min but has essentially the same shape (Figure 1-figure  
406 supplement 1).

407 The reproducibility of force profile data has been discussed previously (15). For wild-type  
408 I27, data points  $L = 61$  and  $63$  residues are a single experiment;  $L = 33, 36, 38, 45, 53, 55$  and  
409  $59$  residues are an average of 2 experiments; all other values of  $L$  are an average of at least 3  
410 experiments. For I27[-A] strand,  $L = 23, 25, 33, 41, 43, 51, 53, 55$  residues are a single  
411 experiment; all other values of  $L$  are an average of 2 experiments, except  $L = 35, 37$  and  $39$   
412 residues which are an average of at least 3 experiments. For I27[L58A], all data points are a  
413 single experiment except  $L = 27, 37, 41, 45, 47, 49$  and  $53$  residues, which are an average of  
414 2 experiments. For I27[M67A],  $L = 23, 25$  and  $51 - 63$  residues are a single experiment;  $L =$   
415  $29 - 35$  residues are an average of 2 experiments;  $L = 27, 37 - 47$  and  $51$  residues are an  
416 average of at least 3 experiments. For wild-type I27 samples incubated for 30 min, all data  
417 points are a single experiment except  $L = 27, 35, 37, 39, 47$  and  $57$  residues, which are an  
418 average of 2 experiments. For non-folding controls, all data points are a single experiment  
419 except for wild-type I27  $L = 29, 31, 39, 43$  and  $47$  residues which are an average of 2  
420 experiments.

421 *Cloning and purification of ribosome-nascent chain complexes*

422 The I27 construct at  $L = 35$ , which is at the peak of  $f_{FL}$  (Figure 1B), was studied by cryoEM.  
423 The SecM AP in these constructs was substituted with the TnaC AP (32) for more stable  
424 arrest, and the constructs were engineered to maintain a linker length of 35 amino acid  
425 residues. An N-terminal 8X His tag was introduced to enable purification. The amino acid  
426 sequence of the construct used was (I27 in bold and TnaC AP underlined):

427 MDMGHHHHHHHDYDIPTTLEVLFGPGTL**I**EVEKPLYGVEVVFVGETAHFEIELS  
428 **EPDVHGQWKLKGQPLAASPDC**EHEDGKKHILILHNCQLGMTGEVSFQAANTKS  
429 AANLKVKELSGSGSGSGGPNILHISVTSKWFNIDNKIVDHRP\*\*

430 The construct was engineered into a pBAD expression vector, under the control of an  
431 arabinose-inducible promoter. The translation-initiation region was optimized as described in  
432 (58). The plasmid was transformed into the *E. coli* KC6  $\Delta smpB \Delta ssrA$  strain. 4 colonies were  
433 picked and tested for expression of the RNCs at 37°C in Lysogeny broth (LB).

434 Large-scale purification of RNCs was carried out based on a protocol described in (32).  
435 Briefly, a single colony of the KC6 cells found to express the RNCs was picked and cultured  
436 in LB at 37°C to an  $A_{600}$  of 0.5. Expression was induced with 0.3% arabinose and was carried  
437 out for 1 hour. Thereafter, the cells were chilled on ice, harvested by centrifugation, and  
438 resuspended in Buffer A at pH 7.5 (50 mM HEPES-KOH, 250 mM KOAc, 2 mM  
439 Tryptophan, 0.1% DDM, 0.1% Complete protease inhibitor). Cell lysis was carried out by  
440 passing the cell suspension thrice through the Emulsifex (Avestin) at 8000 psi at 4°C. The  
441 lysate was cleared of cell debris by centrifugation at 30,000xg for 30 min in the JA25-50  
442 rotor (Beckman Coulter). The supernatant obtained was loaded on a 750 mM sucrose cushion  
443 (in Buffer A) and centrifuged at 45, 000 x g for 24 hours in a Ti70 rotor (Beckman Coulter)  
444 to obtain a crude ribosomal pellet, which was resuspended in 200  $\mu$ l Buffer A by shaking  
445 gently on ice.

446 RNCs from the crude suspension were purified via their His tags by affinity purification  
447 using Talon (Clontech) beads, which was pre-incubated with 10  $\mu$ g/ml tRNA to reduce  
448 unspecific binding of ribosomes. The suspension was incubated with the beads for 1 hour at  
449 4°C and subsequently washed with 20 column volumes of Buffer B at pH 7.5 (50 mM  
450 HEPES-KOH, 10 mM Mg(OAc)<sub>2</sub>, 0.1% Complete Protease Inhibitor, 250 mM sucrose, 2  
451 mM Tryptophan). RNCs were eluted by incubating the Talon beads with Buffer C at pH 7.5  
452 (50 mM HEPES, 150 mM KOAc, 10 mM Mg(OAc)<sub>2</sub>, 0.1% Complete protease inhibitor, 150  
453 mM imidazole, 250 mM sucrose) for 15 minutes and subsequently collecting the flow-



454 through. Elution was carried out thrice and the eluents were concentrated by centrifugation at  
455 40,000 rpm for 2.5 hours in a TLA 100.3 rotor (Beckman Coulter). The pellet obtained at the  
456 end of this step was gently suspended in a minimal volume of Buffer D at pH 7 (20 mM  
457 HEPES-KOH, 50 mM KOAc, 5 mM Mg(OAc)<sub>2</sub>, 125 mM sucrose, 2 mM Trp, 0.03% DDM).

#### 458 *CryoEM sample preparation and data collection*

459 Approximately 4 A<sub>260</sub>/ml units of RNCs were loaded on Quantifoil R2/2 grids coated with  
460 carbon (3 nm thick) and vitrified using the Vitrobot Mark IV (FEI-Thermo) following the  
461 manufacturer's instructions. CryoEM data was collected at the CryoEM National Facility at  
462 the Science for Life Laboratory in Stockholm, Sweden.

463 Data was acquired on a 300 keV Titan Krios microscope (FEI) equipped with a K2 camera  
464 and a direct electron detector (both from Gatan). The camera was calibrated to achieve a  
465 pixel size of 1.06 Å at the specimen level. 30 frames were acquired with an electron dose  
466 0.926 e<sup>-</sup>/Å<sup>2</sup>/frame and a total dose of 27.767 e<sup>-</sup>/Å<sup>2</sup> and defocus values between -1 to -3 μm.  
467 The first two frames were discarded and the rest were aligned using MotionCor2 (59). Raw  
468 images were cropped into squares by RELION 2.1 beta 1 (60). Power-spectra, defocus values  
469 and estimation of resolution were determined using the Gctf software (61) and all 2,613  
470 micrographs were manually inspected in real space, in which 2,613 were retained. 468,015  
471 particles were automatically picked by Gautomatch (<http://www.mrc-lmb.cam.ac.uk/kzhang/>)  
472 using the *E. coli* 70S ribosome as a template. Single particles were processed by RELION 2.1  
473 beta 1 (60). After 80 rounds of 2D classification, 384,039 particles were subjected to 3D  
474 refinement using the *E. coli* 70S ribosome as reference structure, followed by 160 rounds of  
475 3D classification without masking and 25 rounds of tRNA-focused sorting. One major class  
476 containing 301,510 particles (64% of the total) was further refined including using a 50S  
477 mask, resulting in a final reconstruction with an average resolution of 3.2 Å (0.143 FSC). The  
478 local resolution was calculated by ResMap (62). Finally, the final map was obtained by local  
479 B-factoring followed by low-pass filtering to 4.5 Å by RELION 2.1 beta 1 (60) in order to  
480 best demonstrate the I27 domain.

#### 481 *Model docking and validation*

482 The NMR model (PDB: 1TIT) of I27 domain was fitted into the corresponding density using  
483 UCSF Chimera (63). To validate the orientation of the fitted model, all the four possible  
484 orientations were compared. Briefly, the model with four different orientations were

485 converted into densities (8 Å) by UCSF Chimera, and the cross-correlation coefficients of  
486 each model map and the isolated I27 density were calculated by RELION 2.1 beta 1 (60).

#### 487 *Coarse-grained molecular simulations*

488 The 50S subunit of the *E. coli* ribosome (PDB: 3OFR (34)) and the nascent chain are  
489 explicitly represented using one bead at the position of the C $\alpha$  atom per amino acid, and three  
490 beads (for P, C4, N3) per RNA base (Figure 2A). The interactions within the protein were  
491 given by a standard structure-based model (35-37), which allowed it to fold and unfold.  
492 Interactions between the protein and ribosome beads were purely repulsive and given by the  
493 same form of potential as for the structure-based model(35-37), but with the coefficients  
494 determined from a mixing rule,

$$495 \quad V_{ij} = \varepsilon_{ij} \left[ \frac{A}{r_{ij}^{12}} - \frac{B}{r_{ij}^{10}} + \frac{C}{r_{ij}^6} \right] \quad [2]$$

496 where  $r_{ij}$  is the distance between two beads  $i$  and  $j$ ,  $\varepsilon_{ij}$  (=0.001 kJ/mol) sets the strength of  
497 the repulsive interactions. The amino acid, phosphate, sugar and base are assigned with  
498 collision radii  $\sigma_i = 4.5, 3.2, 5.1$  and  $4.5$  Å respectively, and  $A = \sqrt{\sigma_i^{12}\sigma_j^{12}}$ ,  $B = \frac{2}{\sigma_i^{-10} + \sigma_j^{-10}}$   
499 and  $C = \sqrt{\sigma_i^6\sigma_j^6}$ .

500 During the simulations, the ribosome atoms were held immobile, as in previous studies (38).  
501 The linker between the AP and I27 was tethered by its C terminus to the last P atom of the A-  
502 site tRNA, but was otherwise free to fluctuate. The trajectory was propagated via Langevin  
503 dynamics, with a friction coefficient of  $0.1 \text{ ps}^{-1}$  and a time step of 10 fs, at 291 K in a version  
504 of the Gromacs 4.0.5 simulation code, modified to implement the potential given by Equation  
505 2 (64). All bonds (except the one used to measure force, below) were constrained to their  
506 equilibrium length using the LINCS algorithm (65).

507 To calculate the pulling force exerted on the nascent chain by the folding of I27, the bond  
508 between the last and the second last amino acid of the SecM AP was modelled by a harmonic  
509 potential as a function the distance between these two atoms,  $x$  (Figure 3B):

$$510 \quad E = \frac{1}{2} k_s (x - x_0)^2 \quad [3]$$

511 where  $x_0$  is a reference distance. Here  $x_0$  is set to  $3.8$  Å, which is the approximate distance  
512 between adjacent C $\alpha$  atoms in protein structures,  $k_s$  is a spring constant, set to  $3000$   
513 kJ.mol.nm $^{-2}$  so that the average displacement  $x - x_0$  remains below  $1$  Å for forces up to  $\sim 500$



514 pN, which is much larger than the forces actually exerted by the folding protein. The pulling  
515 force on the nascent chain was measured by the extension of this bond as  $F = -k_s(x - x_0)$ .

516 I27 was covalently attached to unstructured linkers having the same sequences as used in the  
517 force-profile experiments (see Figure 1B). Linker amino acids are repulsive to both the  
518 ribosome and I27 beads, with interaction energy as described in Equation 2.

519 The protein in its arrested state is subject to force  $F(t)$ , which will fluctuate, for example  
520 when the protein folds or unfolds. The rate of escape from arrest has been shown to be force-  
521 dependent (27); here we approximate the sensitivity to force using the phenomenological  
522 expression originally proposed by Bell (39)

$$523 \quad k(F) = k_0 e^{\beta F \Delta x^\ddagger}, \quad [4]$$

524 where  $k_0$  is a zero-force rupture rate,  $\Delta x^\ddagger$  is the distance from the free energy minimum to  
525 the transition state,  $\beta = 1/k_B T$  where  $k_B$  is Boltzmann's constant and  $T$  the absolute  
526 temperature. While there are functions to describe force-dependent rates with stronger  
527 theoretical basis, we use the Bell equation due to its simplicity and because its parameters  
528 have previously been estimated from experiment for the SecM AP. In all cases, we set  $k_0$   
529 (Equation 4) to  $3 \times 10^{-4} \text{ s}^{-1}$  and  $\Delta x^\ddagger$  to  $7 \text{ \AA}$ , based on the values determined by Goldman *et al.*  
530 (they estimated  $\Delta x^\ddagger$  to be  $1-9 \text{ \AA}$ ) (27).

531 We assume the probability of remaining on the ribosome  $S(t) = 1 - f_{FL}(t)$  assuming that  
532  $\dot{S} = -k(F(t))$ , hence

$$533 \quad S(t) = \exp\left[-\int_0^t k(F(t)) dt\right]. \quad [5]$$

534 If we further assume that folding is two-state, and that the escape from the ribosome is slow  
535 relative to the folding and unfolding of the protein, we can approximate  $S(t)$  in terms of the  
536 mean forces experienced when the protein is unfolded,  $F_u$ , or folded,  $F_f$ , with unfolded and  
537 folded populations of  $P_u$  and  $P_f$  respectively,

$$538 \quad S(t) \approx \exp\left[-t[P_u k(F_u) + P_f k(F_f)]\right]. \quad [6]$$

539 The equilibrium properties of the system for each linker length were obtained from umbrella  
540 sampling using the fraction of native contacts  $Q$  as the reaction coordinate, allowing  $P_u$ ,  $P_f$   
541 and  $F_u$ ,  $F_f$  to be determined (Figure 3C). The details of the definition of  $Q$  have been  
542 previously described (44); in short,  $Q$  is defined as

543 
$$Q = \frac{1}{N} \sum_{(i,j)} \frac{1}{1 + e^{(r_{ij} - \lambda r_{ij}^0)}}, \quad [7]$$

544 where the sum runs over the  $N$  pairs of native contacts  $(i, j)$ ,  $r_{ij}$  is the distance between  $i$  and  
545  $j$  in configuration,  $r_{ij}^0$  is the distance between  $i$  and  $j$  in the native state,  $\lambda = 1.2$  which  
546 accounts for fluctuations when the contact is formed. A boundary of  $Q = 0.5$  is used to  
547 separate folded from unfolded states.

548 In order to characterize folding mechanism, we used transition paths from folding simulations  
549 for the  $L = 51$  case at 291K. 50 independent simulations, each started from fully extended  
550 configurations, were carried out for 4 microseconds. The folding barriers for the  $L = 31$  and  
551 35 cases are very high at the same temperature, therefore the transition paths are obtained  
552 from unfolding simulations instead. Starting from native-like folded configurations, 50  
553 unfolding simulations were carried out, with each trajectory being 4 microseconds long.  
554 Transition paths were defined as those portions of the simulation trajectory from the last time  
555 127 samples the configuration with  $Q < 0.3$  till the first time it samples a configuration with  $Q$   
556  $> 0.7$  (in the folding direction; opposite for unfolding).  $\phi$ -Values were computed from the  
557 transition paths using the approximation:

558 
$$\phi(i) \approx \sum_{j:(i,j) \in \text{Native}} p(q_{ij}|TP)$$

559 In which  $p(q_{ij}|TP)$  is the probability that the native contact  $q_{ij}$  between residues  $i$  and  $j$  is  
560 formed on transition paths as defined above. We also characterized the importance of  
561 individual contacts in determining the folding mechanism using  $p(TP|q_{ij})_{\text{nn}}$ , defined in  
562 Equation 1 of the main text, i.e. the probability of being on a transition path given that  
563 contact  $q_{ij}$  is formed and the protein is not yet folded. Having already calculated  $p(q_{ij}|TP)$   
564 above, evaluating  $p(TP|q_{ij})_{\text{nn}}$  required  $p(q_{ij})_{\text{nn}}$ , the probability of a contact being formed in  
565 all non-native fragments of the trajectory, and  $p(TP)$ , the fraction of time spent on transition  
566 paths. For  $L=51$ , we obtained  $p(q_{ij})_{\text{nn}}$  directly from unbiased folding simulations, using the  
567 portion of the trajectory up to the first folding event (i.e. the first time  $Q > 0.7$ ). For  $L=31$  or  
568 35, where the protein is still relatively unstable, we determined it from unfolding simulations  
569 by computing  $p(q_{ij})$  separately for the unfolded and transition-path portions of the trajectory  
570 and combining them weighted by  $p(TP)_{\text{nn}}$ . We determined  $p(TP)_{\text{nn}}$  via folding ( $L = 51$

571 case) and unfolding ( $L = 31$  and  $L = 35$  cases) simulations (described above). For the  $L = 51$   
572 case,  $p(\text{TP})_{\text{nn}} = \frac{2t_{\text{TP}}}{2t_{\text{TP}} + t_{\text{F}}^{\text{mfpt}}}$ , where  $t_{\text{TP}}$  is the mean transition path time and  $t_{\text{F}}^{\text{mfpt}}$  is the mean  
573 first passage time for folding obtained from the maximum likelihood estimator  $t_{\text{F}}^{\text{mfpt}} =$   
574  $[N_{\text{fold}}t_{\text{fold}} + (N - N_{\text{fold}})t_{\text{sim}}]/N_{\text{fold}}$ , where  $N$  is the total number of trajectories ( $N = 50$ ),  $N_{\text{fold}}$   
575 is the number of trajectories folding within  $4 \mu\text{s}$ ,  $t_{\text{fold}}$  is the average folding time (of the  
576 trajectories which fold), and  $t_{\text{sim}}$  is the length of the simulations ( $4 \mu\text{s}$ ). For the  $L = 31$  and  $L$   
577  $= 35$  cases, it is less efficient to obtain the folding time  $t_{\text{F}}^{\text{mfpt}}$  directly, therefore we estimate it  
578 based on the mean first passage time for unfolding,  $t_{\text{U}}^{\text{mfpt}}$ , from unfolding simulations.  
579  $p(\text{TP})_{\text{nn}} = \frac{2t_{\text{TP}}}{2t_{\text{TP}} + \frac{p_{\text{U}}}{p_{\text{F}}}t_{\text{U}}^{\text{mfpt}}}$ , where  $p_{\text{U}}$  and  $p_{\text{F}}$  are the equilibrium populations of the unfolded  
580 and folded respectively determined from umbrella sampling.

### 581 *Figure preparation*

582 Figures showing electron densities and atomic models were generated using UCSF Chimera  
583 (63). Electron densities are shown at multiple contour levels in Figure 2 and Figure 2 - figure  
584 supplement 1. The contour levels relative to the root-mean-square deviation (RMSD) were  
585 calculated from the final map values. Final map contains the volume for the entire RNC  
586 including the I27 domain.

587

588

589

### 590 **References**

- 591 1. Anfinsen CB (1973) Principles that govern the folding of protein chains. *Science*  
592 181(4096):223-230.
- 593 2. Onuchic JN, Luthey-Schulten Z, & Wolynes PG (1997) Theory of protein folding: the  
594 energy landscape perspective. *Annual review of physical chemistry* 48(1):545-600.
- 595 3. Dill KA & Chan HS (1997) From Levinthal to pathways to funnels. *Nat Struct Biol*  
596 4(1):10-19.
- 597 4. Tycko R (2004) Progress towards a molecular-level structural understanding of  
598 amyloid fibrils. *Curr Opin Struct Biol* 14(1):96-103.
- 599 5. Clark PL (2004) Protein folding in the cell: reshaping the folding funnel. *Trends*  
600 *Biochem Sci* 29(10):527-534.
- 601 6. Dobson CM (2001) Protein folding and its links with human disease. *Biochem Soc*  
602 *Symp* (68):1-26.
- 603 7. Gloge F, Becker AH, Kramer G, & Bukau B (2014) Co-translational mechanisms of  
604 protein maturation. *Curr Opin Struct Biol* 24:24-33.

- 605 8. Holtkamp W, *et al.* (2015) Cotranslational protein folding on the ribosome monitored  
606 in real time. *Science* 350(6264):1104-1107.
- 607 9. Thommen M, Holtkamp W, & Rodnina MV (2017) Co-translational protein folding:  
608 progress and methods. *Curr Opin Struct Biol* 42:83-89.
- 609 10. Wruck F, Katranidis A, Nierhaus KH, Buldt G, & Hegner M (2017) Translation and  
610 folding of single proteins in real time. *Proc Natl Acad Sci U S A* 114(22):E4399-  
611 E4407.
- 612 11. Jacobs WM & Shakhnovich EI (2017) Evidence of evolutionary selection for co-  
613 translational folding. *arXiv preprint arXiv:1703.10948*.
- 614 12. Krobath H, Shakhnovich EI, & Faisca PF (2013) Structural and energetic  
615 determinants of co-translational folding. *The Journal of chemical physics*  
616 138(21):06B601\_601.
- 617 13. Tanaka T, Hori N, & Takada S (2015) How co-translational folding of multi-domain  
618 protein is affected by elongation schedule: molecular simulations. *PLoS*  
619 *computational biology* 11(7):e1004356.
- 620 14. Nilsson OB, *et al.* (2015) Cotranslational Protein Folding inside the Ribosome Exit  
621 Tunnel. *Cell Rep* 12(10):1533-1540.
- 622 15. Nilsson OB, *et al.* (2017) Cotranslational folding of spectrin domains via partially  
623 structured states. *Nat Struct Mol Biol* 24(3):221-225.
- 624 16. Nilsson OB, Muller-Lucks A, Kramer G, Bukau B, & von Heijne G (2016) Trigger  
625 Factor Reduces the Force Exerted on the Nascent Chain by a Cotranslationally  
626 Folding Protein. *J Mol Biol* 428(6):1356-1364.
- 627 17. Clark PL & King J (2001) A newly synthesized, ribosome-bound polypeptide chain  
628 adopts conformations dissimilar from early in vitro refolding intermediates. *J Biol*  
629 *Chem* 276(27):25411-25420.
- 630 18. Kaiser CM, Goldman DH, Chodera JD, Tinoco I, Jr., & Bustamante C (2011) The  
631 ribosome modulates nascent protein folding. *Science* 334(6063):1723-1727.
- 632 19. Javed A, Christodoulou J, Cabrita LD, & Orlova EV (2017) The ribosome and its role  
633 in protein folding: looking through a magnifying glass. *Acta Crystallogr D Struct Biol*  
634 73(Pt 6):509-521.
- 635 20. Rodnina MV (2016) The ribosome in action: Tuning of translational efficiency and  
636 protein folding. *Protein Sci* 25(8):1390-1406.
- 637 21. Knight AM, *et al.* (2013) Electrostatic effect of the ribosomal surface on nascent  
638 polypeptide dynamics. *ACS Chem Biol* 8(6):1195-1204.
- 639 22. Cabrita LD, *et al.* (2016) A structural ensemble of a ribosome-nascent chain complex  
640 during cotranslational protein folding. *Nat Struct Mol Biol* 23(4):278-285.
- 641 23. Fedorov AN & Baldwin TO (1995) Contribution of cotranslational folding to the rate  
642 of formation of native protein structure. *Proc Natl Acad Sci U S A* 92(4):1227-1231.
- 643 24. Nicola AV, Chen W, & Helenius A (1999) Co-translational folding of an alphavirus  
644 capsid protein in the cytosol of living cells. *Nat Cell Biol* 1(6):341-345.
- 645 25. Ugrinov KG & Clark PL (2010) Cotranslational folding increases GFP folding yield.  
646 *Biophys J* 98(7):1312-1320.
- 647 26. Evans MS, Clarke TF, & Clark PL (2005) Conformations of co-translational folding  
648 intermediates. *Protein Pept Lett* 12(2):189-195.
- 649 27. Goldman DH, *et al.* (2015) Mechanical force releases nascent chain-mediated  
650 ribosome arrest *in vitro* and *in vivo*. *Science* 348(6233):457-460.
- 651 28. Ismail N, Hedman R, Schiller N, & von Heijne G (2012) A biphasic pulling force acts  
652 on transmembrane helices during translocon-mediated membrane integration. *Nat*  
653 *Struct Mol Biol* 19(10):1018-1022.

- 654 29. Kramer G, *et al.* (2002) L23 protein functions as a chaperone docking site on the  
655 ribosome. *Nature* 419(6903):171-174.
- 656 30. Gong F & Yanofsky C (2003) A transcriptional pause synchronizes translation with  
657 transcription in the tryptophanase operon leader region. *J Bacteriol* 185(21):6472-  
658 6476.
- 659 31. Seidelt B, *et al.* (2009) Structural insight into nascent polypeptide chain-mediated  
660 translational stalling. *Science* 326(5958):1412-1415.
- 661 32. Bischoff L, Berninghausen O, & Beckmann R (2014) Molecular basis for the  
662 ribosome functioning as an L-tryptophan sensor. *Cell Rep* 9(2):469-475.
- 663 33. Improtà S, Politou AS, & Pastore A (1996) Immunoglobulin-like modules from titin  
664 I-band: extensible components of muscle elasticity. *Structure* 4(3):323-337.
- 665 34. Dunkle JA, Xiong L, Mankin AS, & Cate JH (2010) Structures of the Escherichia coli  
666 ribosome with antibiotics bound near the peptidyl transferase center explain spectra of  
667 drug action. *Proc Natl Acad Sci U S A* 107(40):17152-17157.
- 668 35. Karanicolas J & Brooks CL, 3rd (2003) Improved Go-like models demonstrate the  
669 robustness of protein folding mechanisms towards non-native interactions. *J Mol Biol*  
670 334(2):309-325.
- 671 36. Karanicolas J & Brooks CL, 3rd (2003) The importance of explicit chain  
672 representation in protein folding models: an examination of Ising-like models.  
673 *Proteins* 53(3):740-747.
- 674 37. Karanicolas J & Brooks CL, 3rd (2003) The structural basis for biphasic kinetics in  
675 the folding of the WW domain from a formin-binding protein: lessons for protein  
676 design? *Proc Natl Acad Sci U S A* 100(7):3954-3959.
- 677 38. O'Brien EP, Christodoulou J, Vendruscolo M, & Dobson CM (2011) New scenarios  
678 of protein folding can occur on the ribosome. *J Am Chem Soc* 133(3):513-526.
- 679 39. Bell GI (1978) Models for the specific adhesion of cells to cells. *Science*  
680 200(4342):618-627.
- 681 40. Fowler SB & Clarke J (2001) Mapping the folding pathway of an immunoglobulin  
682 domain: structural detail from Phi value analysis and movement of the transition state.  
683 *Structure* 9(5):355-366.
- 684 41. Fowler SB, *et al.* (2002) Mechanical unfolding of a titin Ig domain: structure of  
685 unfolding intermediate revealed by combining AFM, molecular dynamics  
686 simulations, NMR and protein engineering. *J Mol Biol* 322(4):841-849.
- 687 42. Best RB & Hummer G (2016) Microscopic interpretation of folding  $\phi$ -values using  
688 the transition path ensemble. *Proceedings of the National Academy of Sciences*  
689 113(12):3263-3268.
- 690 43. Sánchez IE & Kiefhaber T (2003) Origin of unusual  $\phi$ -values in protein folding:  
691 evidence against specific nucleation sites. *Journal of molecular biology* 334(5):1077-  
692 1085.
- 693 44. Best RB, Hummer G, & Eaton WA (2013) Native contacts determine protein folding  
694 mechanisms in atomistic simulations. *Proc Natl Acad Sci U S A* 110(44):17874-  
695 17879.
- 696 45. Best RB, *et al.* (2003) Mechanical unfolding of a titin Ig domain: structure of  
697 transition state revealed by combining atomic force microscopy, protein engineering  
698 and molecular dynamics simulations. *J Mol Biol* 330(4):867-877.
- 699 46. Scott KA, Steward A, Fowler SB, & Clarke J (2002) Titin; a multidomain protein that  
700 behaves as the sum of its parts. *J Mol Biol* 315(4):819-829.
- 701 47. Williams PM, *et al.* (2003) Hidden complexity in the mechanical properties of titin.  
702 *Nature* 422(6930):446-449.



- 703 48. Wright CF, Lindorff-Larsen K, Randles LG, & Clarke J (2003) Parallel protein-  
704 unfolding pathways revealed and mapped. *Nat Struct Biol* 10(8):658-662.
- 705 49. Wright CF, Steward A, & Clarke J (2004) Thermodynamic characterisation of two  
706 transition states along parallel protein folding pathways. *J Mol Biol* 338(3):445-451.
- 707 50. Borgia MB, Nickson AA, Clarke J, & Hounslow MJ (2013) A mechanistic model for  
708 amorphous protein aggregation of immunoglobulin-like domains. *J Am Chem Soc*  
709 135(17):6456-6464.
- 710 51. Botello E, *et al.* (2009) Temperature and chemical denaturant dependence of forced  
711 unfolding of titin I27. *J Phys Chem B* 113(31):10845-10848.
- 712 52. Chen H, *et al.* (2015) Dynamics of equilibrium folding and unfolding transitions of  
713 titin immunoglobulin domain under constant forces. *J Am Chem Soc* 137(10):3540-  
714 3546.
- 715 53. Lu H, Isralewitz B, Krammer A, Vogel V, & Schulten K (1998) Unfolding of titin  
716 immunoglobulin domains by steered molecular dynamics simulation. *Biophys J*  
717 75(2):662-671.
- 718 54. Nunes JM, Mayer-Hartl M, Hartl FU, & Muller DJ (2015) Action of the Hsp70  
719 chaperone system observed with single proteins. *Nat Commun* 6:6307.
- 720 55. Yagawa K, *et al.* (2010) Structural basis for unfolding pathway-dependent stability of  
721 proteins: vectorial unfolding versus global unfolding. *Protein Sci* 19(4):693-702.
- 722 56. Su T, *et al.* (2017) The force-sensing peptide VemP employs extreme compaction and  
723 secondary structure formation to induce ribosomal stalling. *eLife* 6:e25642.
- 724 57. Ziv G, Haran G, & Thirumalai D (2005) Ribosome exit tunnel can entropically  
725 stabilize  $\alpha$ -helices. *Proceedings of the National Academy of Sciences of the United*  
726 *States of America* 102(52):18956-18961.
- 727 58. Mirzadeh K, *et al.* (2015) Enhanced Protein Production in Escherichia coli by  
728 Optimization of Cloning Scars at the Vector-Coding Sequence Junction. *ACS Synth*  
729 *Biol* 4(9):959-965.
- 730 59. Li X, *et al.* (2013) Electron counting and beam-induced motion correction enable  
731 near-atomic-resolution single-particle cryo-EM. *Nat Methods* 10(6):584-590.
- 732 60. Scheres SH (2012) RELION: implementation of a Bayesian approach to cryo-EM  
733 structure determination. *J Struct Biol* 180(3):519-530.
- 734 61. Zhang K (2016) Gctf: Real-time CTF determination and correction. *J Struct Biol*  
735 193(1):1-12.
- 736 62. Kucukelbir A, Sigworth FJ, & Tagare HD (2014) Quantifying the local resolution of  
737 cryo-EM density maps. *Nat Methods* 11(1):63-65.
- 738 63. Pettersen EF, *et al.* (2004) UCSF Chimera--a visualization system for exploratory  
739 research and analysis. *J Comput Chem* 25(13):1605-1612.
- 740 64. Hess B, Kutzner C, Van Der Spoel D, & Lindahl E (2008) GROMACS 4: algorithms  
741 for highly efficient, load-balanced, and scalable molecular simulation. *J Chem Theory*  
742 *and Comput* 4(3):435-447.
- 743 65. Hess B, Bekker H, Berendsen HJ, & Fraaije JG (1997) LINCS: a linear constraint  
744 solver for molecular simulations. *J Comput Chem* 18(12):1463-1472.
- 745

746

747

748 **Supplementary Figures**

749

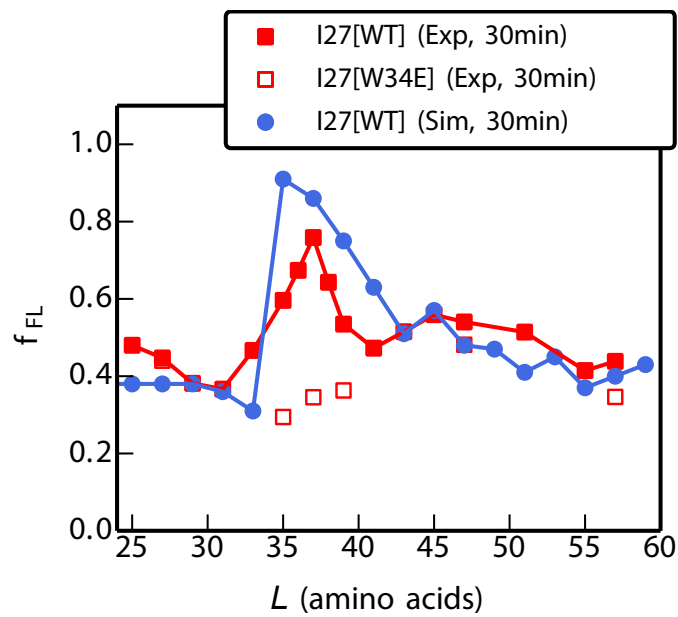

750

751 **Figure 1 - figure supplement 1.** Experimental (red) and simulated (blue) profiles of fraction  
752 full length protein,  $f_{FL}$ , obtained with a 30 min incubation. Note the higher background values  
753 compared to main text Figures 1 and 3D.

754

755

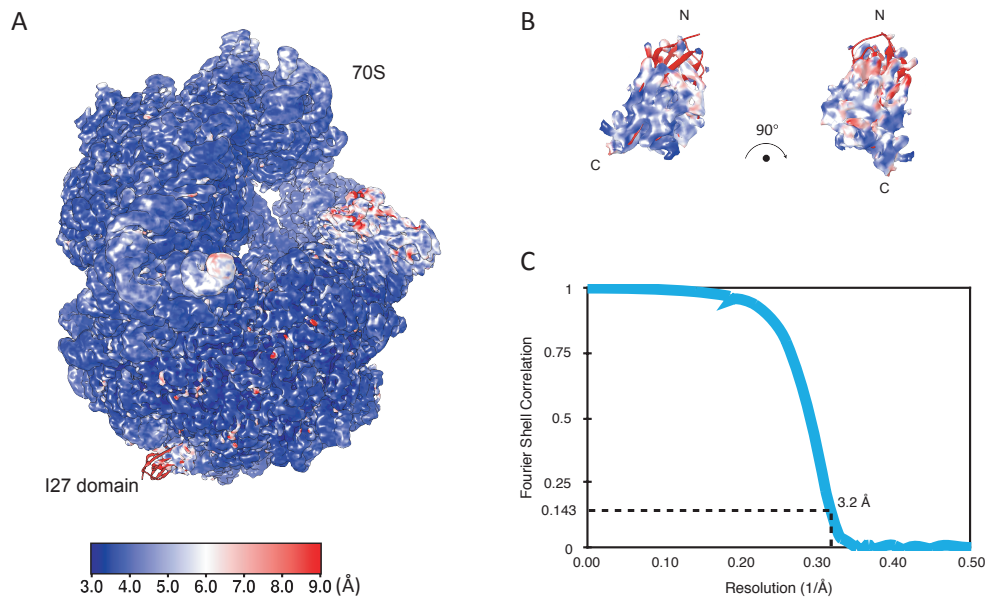

756

757 **Figure 2 - figure supplement 1.** Resolution of the ribosome-nascent chain complex (RNC).

758 (A) Calculation of the local resolution using Resmap (Kucukelbir, A. et al. Nat Methods 11,

759 63-65, 2014). The RNC density is displayed at 1.7 RMSD. (B) local resolution of the I27

760 domain. The I27 domain density is displayed at 2 RMSD. N and C termini are indicated. (C)

761 Fourier-shell correlation (FSC) curve of the refined final map of the RNC, indicating the

762 average resolution of 3.2 Å (at 0.143).

763



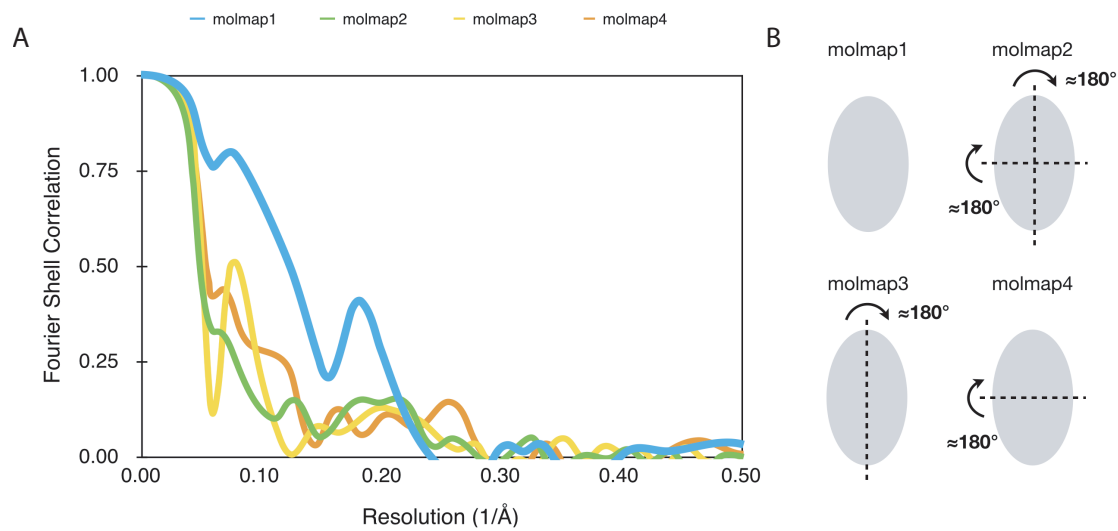

764

765 **Figure 2 - figure supplement 2.** Validation of model orientation for I27 domain. To validate  
766 the orientation of the I27 domain model (PDB: 1TIT) to its corresponding density, three other  
767 possible orientations were tested. (A) The Fourier-shell correlations between the isolated I27  
768 density and the map generated from the model of the final orientation (molmap1, blue) and  
769 the models fitted with the other three possibilities (molmap2, green; molmap3, yellow;  
770 molmap4, orange) were plotted. (B) The illustration showing the relationship among the four  
771 model orientations. Major and minor axes were used as the principle of finding possible  
772 orientations for the overall ellipsoid shaped map and model.

773

774

775

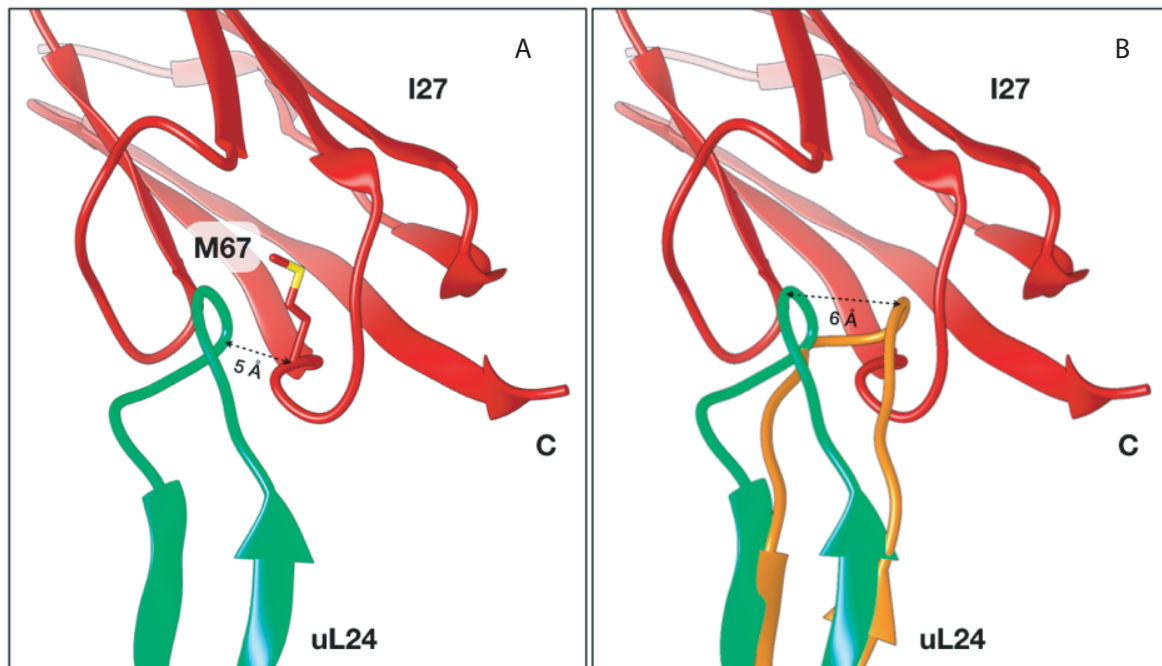

776

777 **Figure 2 - figure supplement 3.** The I27 domain and a  $\beta$  hairpin in ribosomal protein uL24  
778 close to the ribosomal exit tunnel. (A) Residue M67 in the I27 domain is located in close  
779 proximity to a  $\beta$  hairpin loop in uL24 in the cryo-EM structure of I27-TnaC[L=35] RNCs. (B)  
780 The uL24  $\beta$  hairpin in the I27-RNC (light green; re-modeled based on PDB: 5NWY) is  $\sim 6$  Å  
781 shifted (distance measured via the backbone of Pro50) compared to its location in the VemP-  
782 RNC (orange; PDB: 5NWY) and the TnaC-RNC (PDB: 4UY8, not shown). C represents the  
783 C terminus of the I27 domain.

784

785

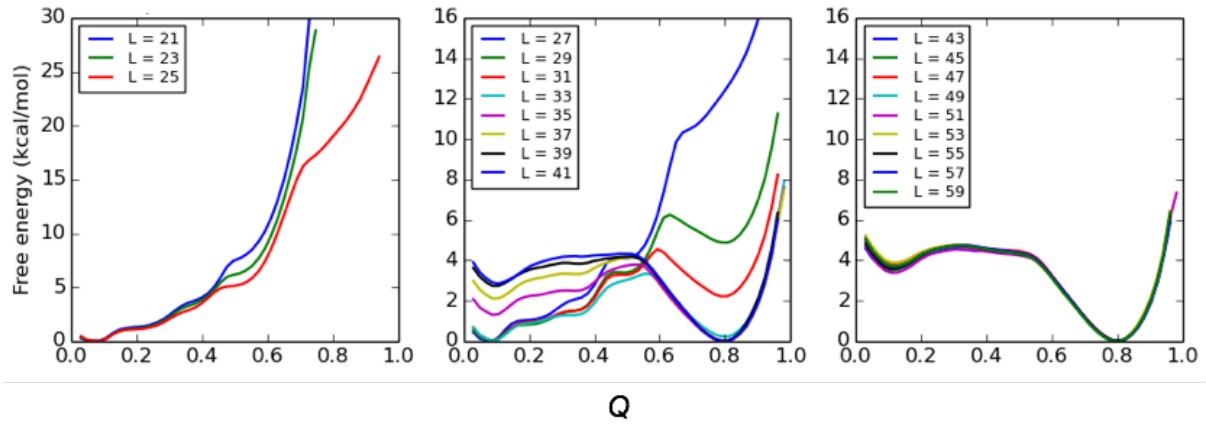

786

787 **Figure 3 - figure supplement 1.** Simulation free energy  $F(Q)$  projected on the fraction of  
788 native contacts,  $Q$ , for I27 folding with different linker lengths (as indicated in legend) at  
789 291K.

790

791
